# Supplementary material for: The Chemical, Rheological, and Sensorial Characteristics of Arabic Bread Prepared from Wheat-Orange Sweet Potatoes Flour or Peel
Source: MDPI journal article supplement (doi:10.3390/foods12081658), 2023-04-15
Supplement: s1 [file s1]

# Tables

**Table S1.** Color evaluation of bread containing substituted flour with different levels of sweet potato four (SPF) and sweet potato four (SPP)

| Sample  |    | Color L*              | Color a*              | Color b*              |
|---------|----|-----------------------|-----------------------|-----------------------|
| CB      |    | 80.1±0.3 <sup>a</sup> | 4.8±0.1 <sup>d</sup>  | 26.5±0.3 <sup>c</sup> |
| W-SPF % | 10 | 79.4±0.9 <sup>a</sup> | 6.01±0.6 <sup>c</sup> | 28.8±0.9 <sup>b</sup> |
|         | 20 | 75±0.3 <sup>b</sup>   | 7.5±0.1 <sup>b</sup>  | 31.3±0.3 <sup>a</sup> |
|         | 30 | 72.3±0.4 <sup>c</sup> | 6.4±0.1 <sup>c</sup>  | 26.2±0.3 <sup>c</sup> |
| W-SPP % | 5  | 67.8±0.5 <sup>d</sup> | 7.2±0.4 <sup>b</sup>  | 25.1±0.2 <sup>d</sup> |
|         | 10 | 67.9±0.9 <sup>d</sup> | 10.1±0.1 <sup>a</sup> | 31.4±1.1 <sup>a</sup> |
|         | 15 | 68.2±1.0 <sup>d</sup> | 7.3±0.2 <sup>b</sup>  | 27.1±0.3 <sup>c</sup> |

Each value represents the mean (±SD) of three different replications. The different letters on the same column show a significant difference according to Duncan's test at  $p \leq 0.05$ .

**Table S2.** Sensory evaluation of bread containing substituted flour with different levels of sweet potato four (SPF) and sweet potato four (SPP)

| Sample         | Appearance           | Color                | Crumb                 | Roundness            | Texture              | Chewability          | Taste                | Aroma                | Overall              |
|----------------|----------------------|----------------------|-----------------------|----------------------|----------------------|----------------------|----------------------|----------------------|----------------------|
| <b>CB</b>      | 8.9±1.0 <sup>a</sup> | 9.0±0.9 <sup>a</sup> | 8.5±0.9 <sup>a</sup>  | 9.0±0.8 <sup>a</sup> | 9.0±1.0 <sup>a</sup> | 8.7±0.9 <sup>a</sup> | 9.0±0.9 <sup>a</sup> | 8.8±1 <sup>a</sup>   | 8.9±0.8 <sup>a</sup> |
| <b>B-SPF %</b> | <b>10</b>            | 8.5±1.5 <sup>a</sup> | 8.6±1.6 <sup>ab</sup> | 8.3±1.3 <sup>a</sup> | 8.3±1.5 <sup>a</sup> | 8.5±1.5 <sup>a</sup> | 8.7±1.5 <sup>a</sup> | 8.3±1.3 <sup>a</sup> | 8.4±1.5 <sup>a</sup> |
|                | <b>20</b>            | 8.8±1.2 <sup>a</sup> | 8.7±1.3 <sup>a</sup>  | 8.8±1.4 <sup>a</sup> | 9.0±1.3 <sup>a</sup> | 8.9±1.4 <sup>a</sup> | 9.0±1.2 <sup>a</sup> | 8.9±1.0 <sup>a</sup> | 8.8±1.2 <sup>a</sup> |
|                | <b>30</b>            | 8.6±1.0 <sup>a</sup> | 8.6±1.1 <sup>ab</sup> | 8.5±1.3 <sup>a</sup> | 8.5±1.1 <sup>a</sup> | 8.8±1.1 <sup>a</sup> | 8.8±0.9 <sup>a</sup> | 8.1±1.1 <sup>a</sup> | 8.7±2 <sup>a</sup>   |
| <b>B-SPP %</b> | <b>5</b>             | 8.6±1.6 <sup>a</sup> | 8.8±0.8 <sup>a</sup>  | 8.5±1.3 <sup>a</sup> | 8.7±1.6 <sup>a</sup> | 8.7±0.7 <sup>a</sup> | 8.6±0.7 <sup>a</sup> | 8.8±0.6 <sup>a</sup> | 8.8±1 <sup>a</sup>   |
|                | <b>10</b>            | 8.1±1.4 <sup>a</sup> | 8.1±0.9 <sup>ab</sup> | 8.5±1.1 <sup>a</sup> | 8.5±1.6 <sup>a</sup> | 8.6±1.2 <sup>a</sup> | 8.7±1.1 <sup>a</sup> | 8.4±1.7 <sup>a</sup> | 8.5±1 <sup>a</sup>   |
|                | <b>15</b>            | 7.8±1.1 <sup>a</sup> | 7.6±1.1 <sup>b</sup>  | 8.4±1.3 <sup>a</sup> | 8.1±1.4 <sup>a</sup> | 8.2±1.2 <sup>a</sup> | 8.6±1.1 <sup>a</sup> | 8.1±1.4 <sup>a</sup> | 7.7±2 <sup>a</sup>   |

Each value represents the mean (±SD) of three different replications. The different letters on the same column show a significant difference according to Duncan's test at  $p \leq 0.05$ .

# Figures

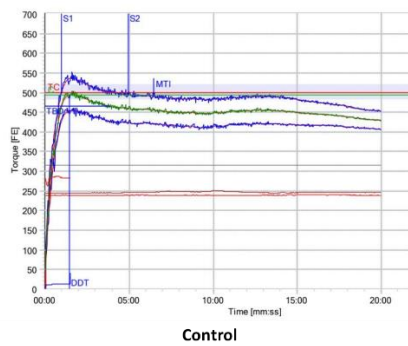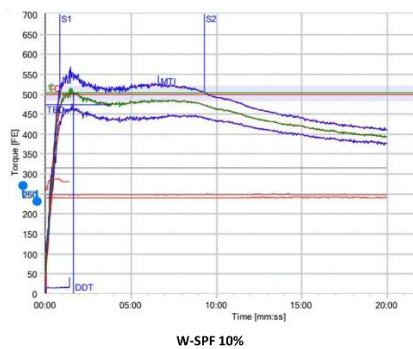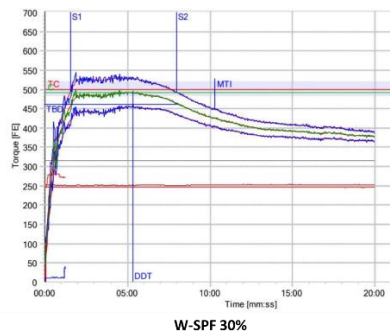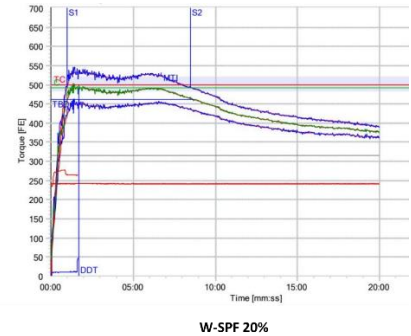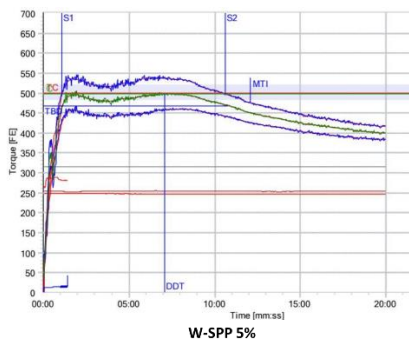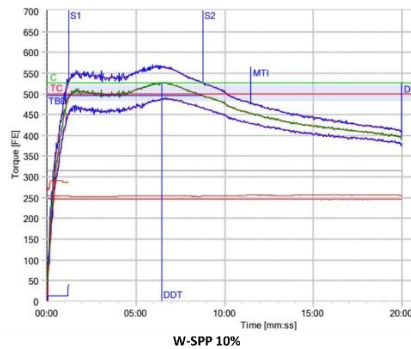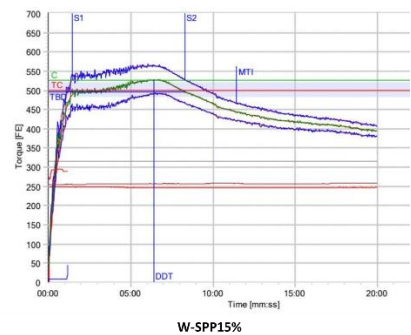

**Figure S1.** Farinograph diagrams of samples. CB: control bread, W-: wheat flour, SPF: sweet potato flour, SPP: sweet potato peel.

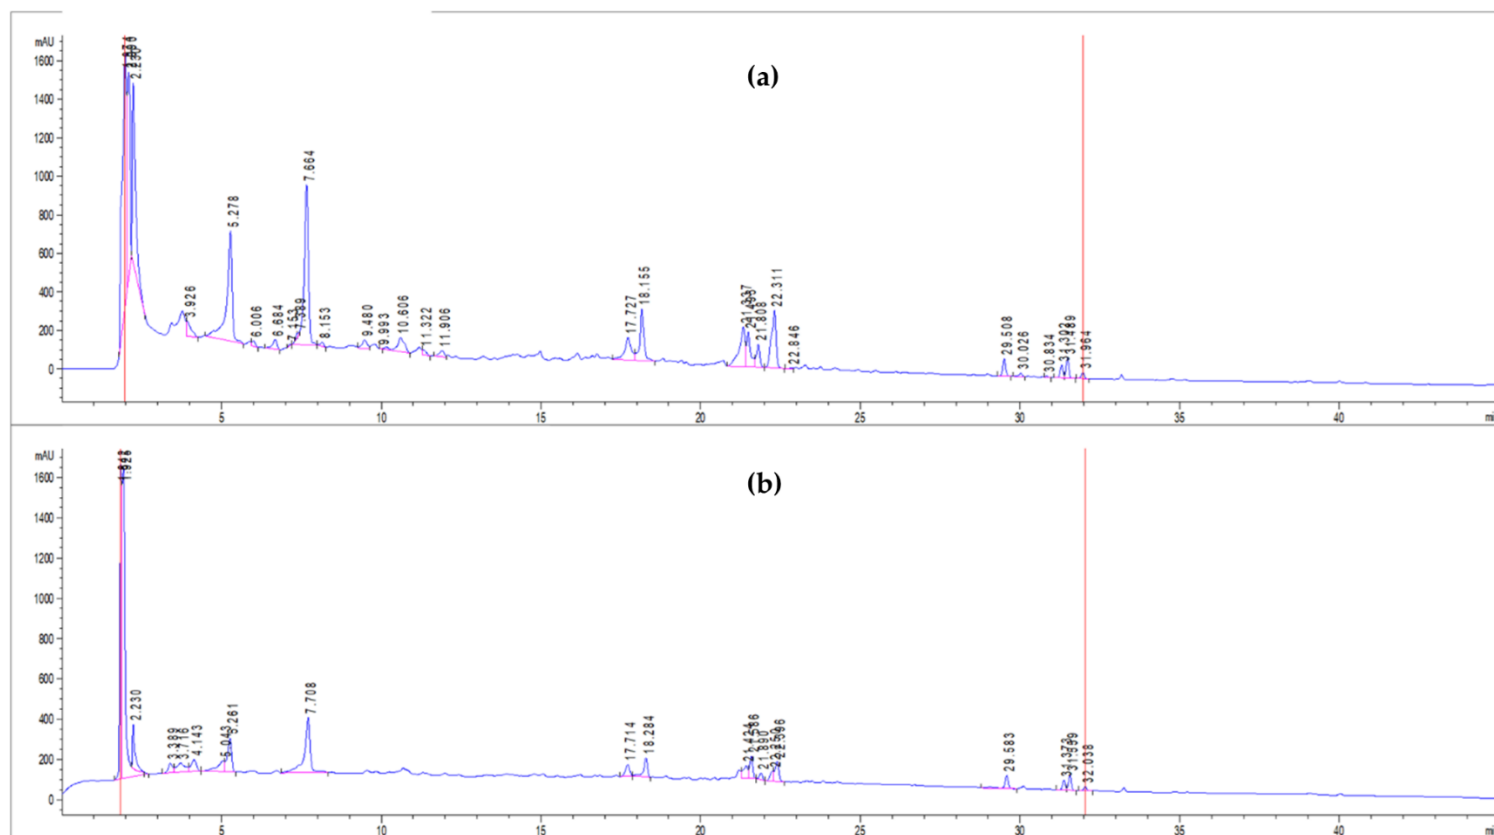

**Figure S2.** LC-Tandem MS chromatograms of sweet potato peel (SPP; a) and sweet potato flour (SPF; b).
